# Supplementary material for: MnOx dispersed on attapulgite derived Al-SBA-15: a promising catalyst for volatile organic compound combustion
Source: Royal Society of Chemistry journal article supplement (doi:10.1039/c9ra08157g), 2020-01-01
Supplement: c9ra08157g1.pdf [file c9ra08157g1.pdf]

***Electronic Supplementary Information***

**MnO<sub>x</sub> dispersed on attapulgite derived Al-SBA-15: A  
promising catalyst for volatile organic compounds  
combustion**

Jie Meng, Fan Fang, Nengjie Feng, Hui Wan\* and Guofeng Guan\*

*State Key Laboratory of Materials-Oriented Chemical Engineering, College of  
Chemical Engineering, Jiangsu National Synergetic Innovation Center for Advanced  
Materials, Jiangsu Collaborative Innovation Center for Advanced Inorganic Function  
Composites, Nanjing Tech University, Nanjing 210009, P.R. China*

*\*Corresponding author:*

*Prof. Guofeng Guan, E-mail address: guangf@njtech.edu.cn Tel: +86 25 83587198*

*Prof. Hui Wan, E-mail address: wanhui@njtech.edu.cn*

In the Electronic Supplementary Information, the attapulgite is denoted as ATP

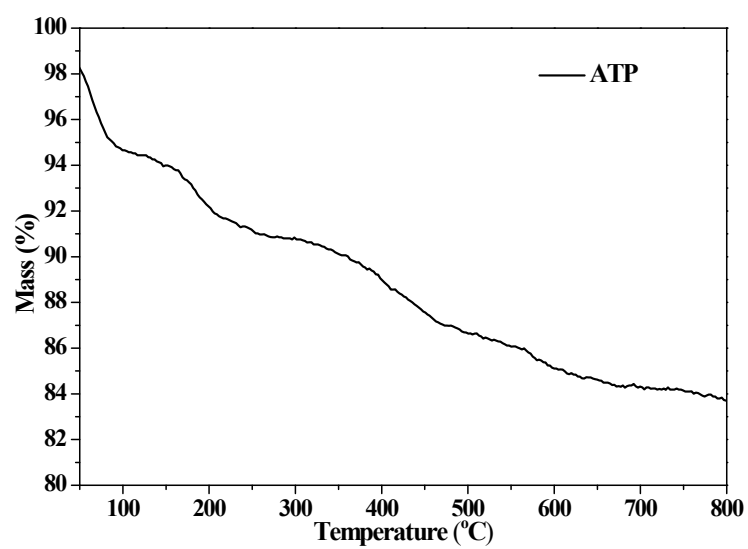

**Figure S1.** The thermogravimetric of ATP.

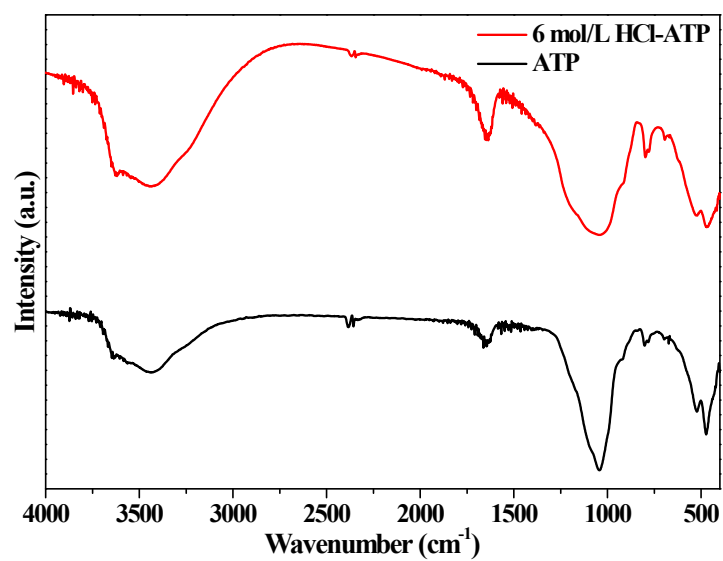

**Figure S2.** FT-IR spectra of ATP and ATP that acidified by hydrochloric acid.

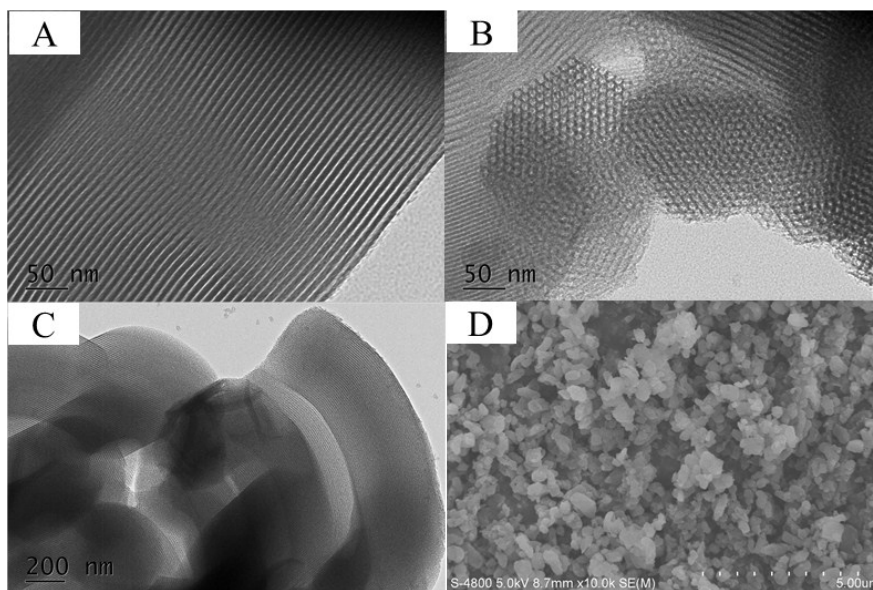

**Figure S3.** SEM and TEM images of Al-SBA-15.

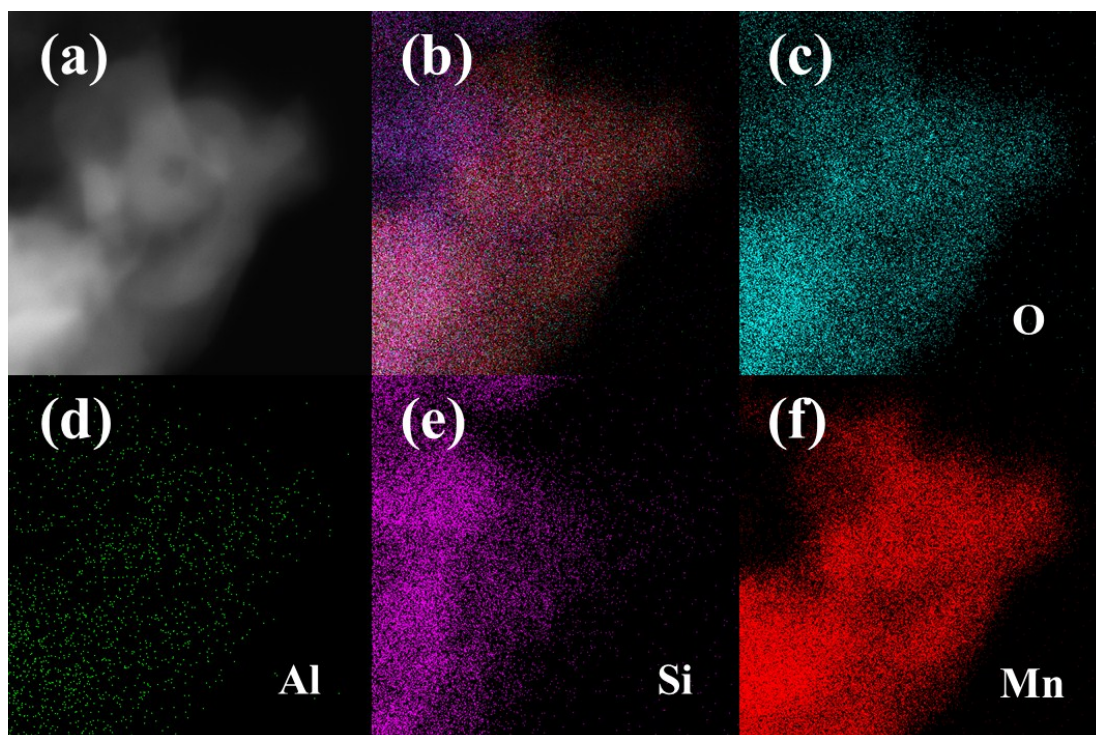

**Figure S4.** TEM-EDX mappings of 8%Mn/Al-SBA-15 (oxygen (O), aluminum (Al), silicon (Si), manganese (Mn) of the area in (a) and (b)).

**Table S1** The chemical composition of ATP and Al-SBA-15 derived by XRF.

| Chemical composition    | SiO <sub>2</sub> | MgO   | Al <sub>2</sub> O <sub>3</sub> | Fe <sub>2</sub> O <sub>3</sub> | CaO  | K <sub>2</sub> O | MnO <sub>x</sub> |
|-------------------------|------------------|-------|--------------------------------|--------------------------------|------|------------------|------------------|
| ATP Content (wt%)       | 54.30            | 12.71 | 7.92                           | 4.71                           | 3.42 | 0.62             | 0.32             |
| Al-SBA-15 Content (wt%) | 95.88            | 0.08  | 3.00                           | 0.09                           | 0.02 | 0.05             | 0.04             |
